# Supplementary material for: Nylon binder enables high-performance flexible ultra-thick electrode preparation in a water-based environment
Source: Royal Society of Chemistry journal article supplement (doi:10.1039/d4ta01472c), 2024-01-01
Supplement: d4ta01472c1.pdf [file d4ta01472c1.pdf]

*Supporting Information*

**Nylon binder unlocks high-performance flexible thick electrodes prepared in water-based environment**

*Li Jiang,<sup>‡ a</sup> GuoJing Zang,<sup>‡a</sup> Xiu Liu,<sup>a</sup> Ling Chen,<sup>a</sup> Yaoguang Chen,<sup>b</sup> Jinghao Xie,<sup>a</sup> Zhongxin Liang,<sup>c</sup> Fuzhen Li,<sup>a</sup> Zishou Zhang<sup>\*a</sup>*

- a. Key Laboratory for Polymeric Composite and Functional Materials of Ministry of Education, Key Laboratory of High-Performance Polymer-Based Composites of Guangdong Province, School of Chemistry, Sun Yat-sen University, Guangzhou 510275, China. E-mail: [zhzish@mail.sysu.edu.cn](mailto:zhzish@mail.sysu.edu.cn)
- b. School of Chemistry and Chemical Engineering, Lingnan Normal University, Guangdong, 524048, China.
- c. Department of Physics and Texas Center for Superconductivity at the University of Houston (TcSUH), Houston, TX 77204, USA.

---

<sup>‡</sup> L. J. and G. Z. contributed equally to this work.

Figures:

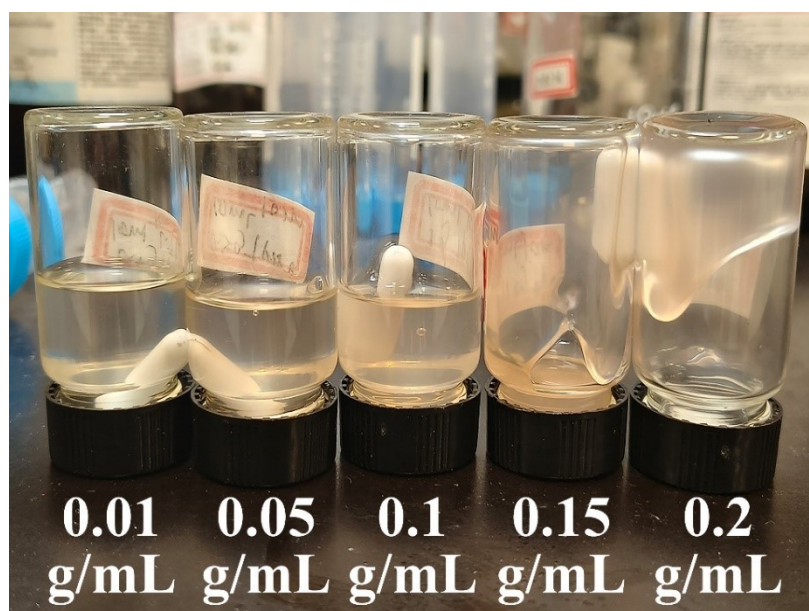

Fig S1. Photos of 0.01-0.2 g·mL<sup>-1</sup> TPAAE/LiTFSI/Water (10 M) solution.

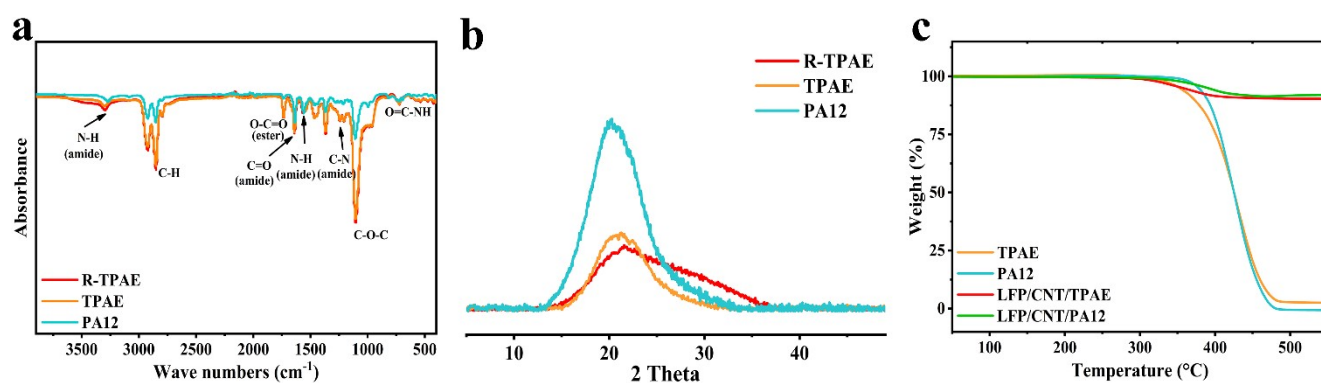

Fig S2. (a) FTIR spectra of TPAAE, PA12, and R-TPAE. (b) XRD patterns of TPAAE, R-TPAE, and PA12. (c) The TGA plots of TPAAE, R-TPAE, PA12, LFP/CNT/TPAAE, and LFP/CNT/PA12.

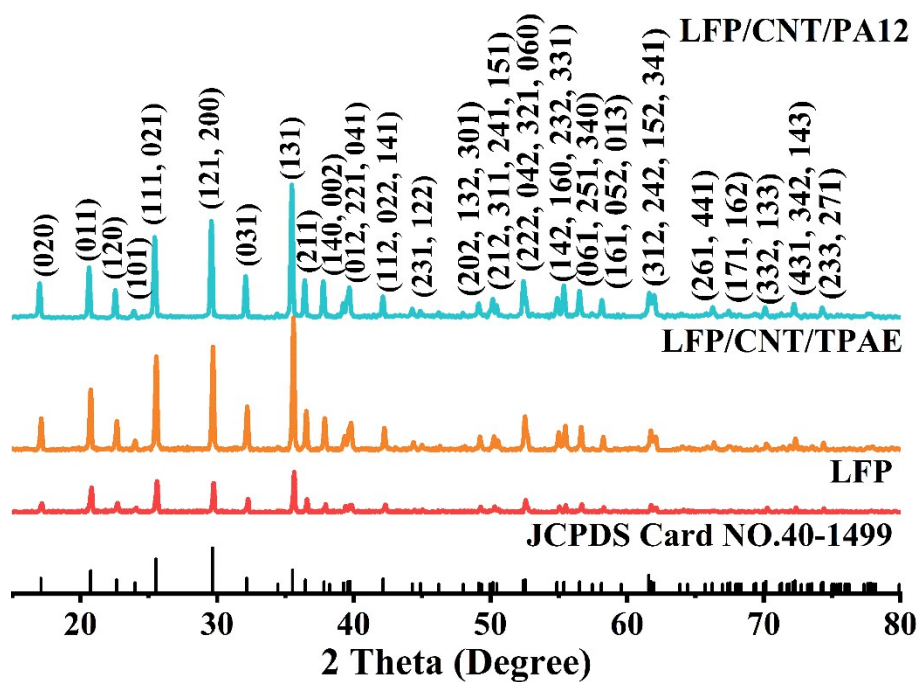

Fig S3. XRD patterns of LFP, LFP/CNT/TPAE, and LFP/CNT/PA12.

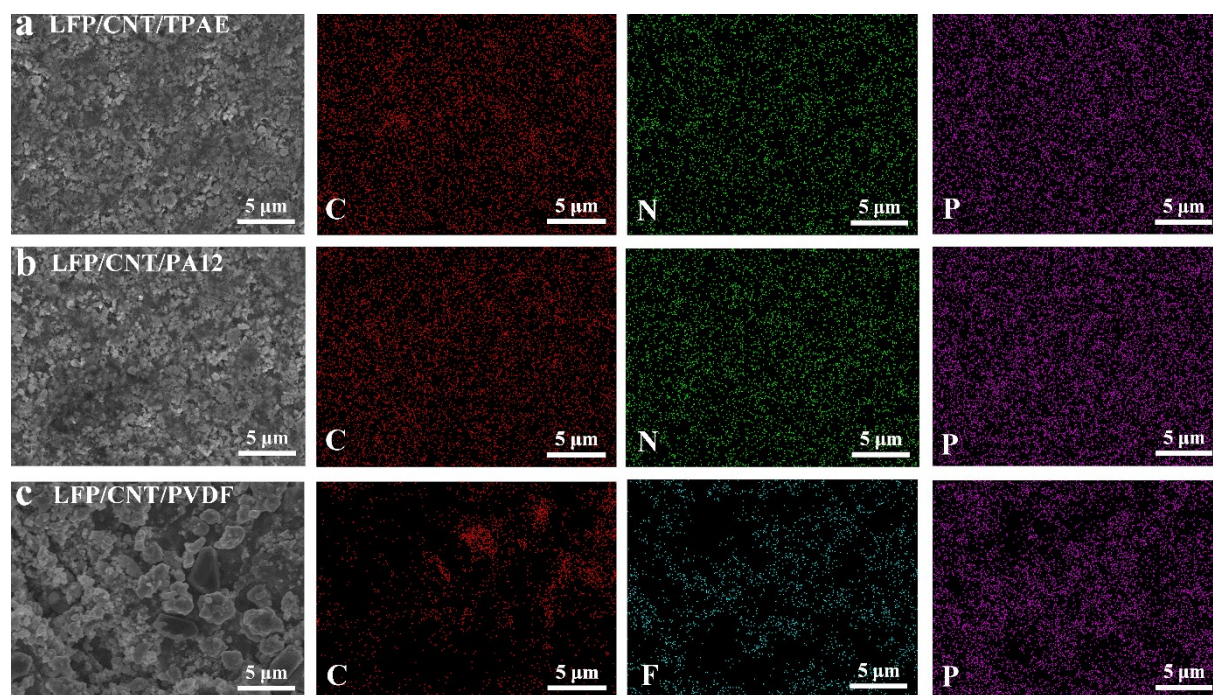

Fig S4. SEM-EDS images of (a) LFP/CNT/TPAE, (b) LFP/CNT/PA12, and (c) LFP/CNT/PVDF.



**Table S1.** Test results of Mercury porosimetry.

| Sample name         | Porosity<br>(%) | Average pore diameter<br>(4V/A/nm) | Median pore diameter<br>(V/nm) | Total pore volume<br>(ml·g <sup>-1</sup> ) | Total pore area<br>(m <sup>2</sup> ·g <sup>-1</sup> ) |
|---------------------|-----------------|------------------------------------|--------------------------------|--------------------------------------------|-------------------------------------------------------|
| LFP/CNT/TPAE-3 mm   | 46.0204         | 108.81                             | 126.64                         | 0.3264                                     | 11.999                                                |
| LFP/CNT/TPAE-200 μm | 56.2402         | 148.65                             | 2,958.36                       | 0.6174                                     | 16.615                                                |
| LFP/CNT/TPAE-100 μm | 64.9344         | 347.83                             | 76,790.13                      | 0.8857                                     | 10.185                                                |
| LFP/CNT/TPAE-20 μm  | 71.5304         | 499.22                             | 50,765.03                      | 1.1122                                     | 8.911                                                 |
| LFP/CNT/PA12-20 μm  | 72.8071         | 403.13                             | 30,388.68                      | 1.1491                                     | 11.401                                                |

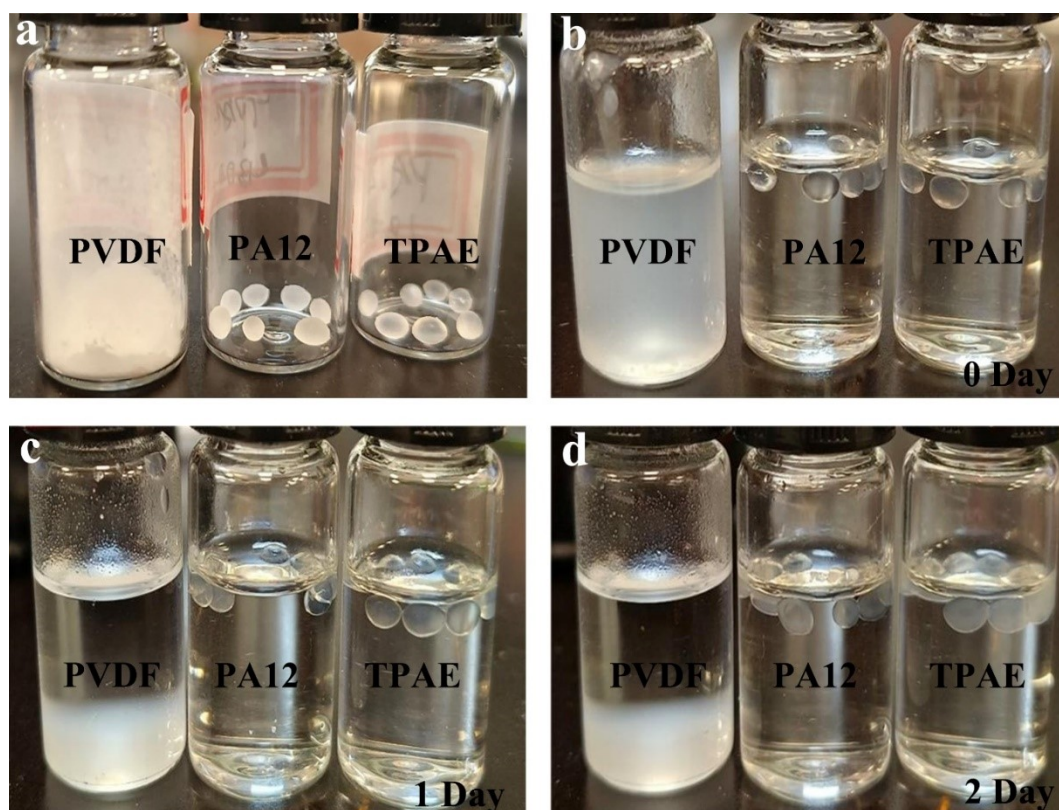

**Fig S5.** (a) Photos of TPAAE particles, PA12 particles, and PVDF powder. Photos of the TPAAE 0-day (b), 1-day (c), and 2-day (d) immersion in the electrolyte of 1 M LiPF<sub>6</sub> dissolved in EC/DMC/EMC (1:1:1 by volume) at 25°C.

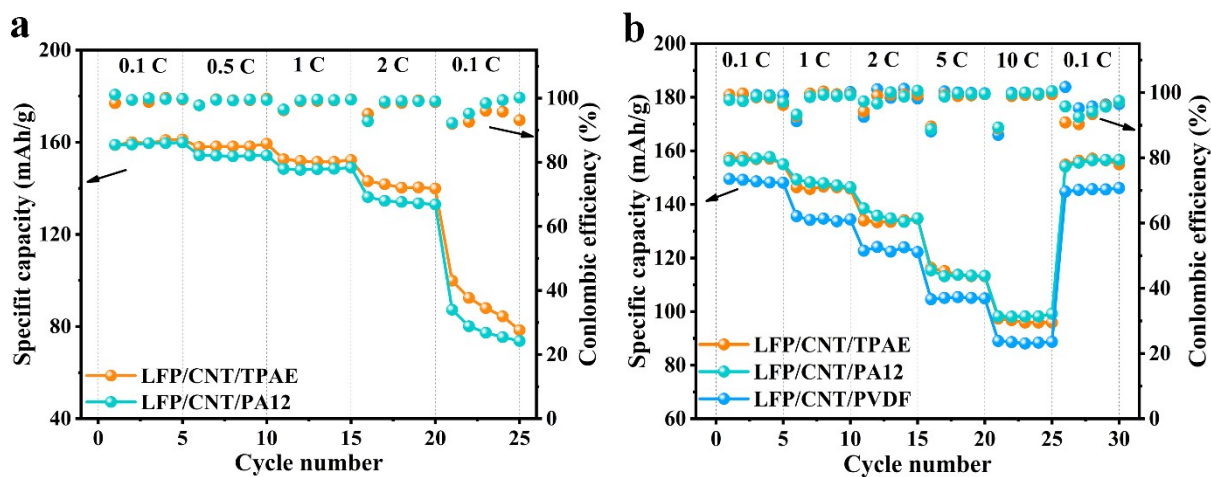

Fig S6. (a) Rate capabilities of LFP/CNT/TPAE and LFP/CNT/PA12 with a mass loading of  $\sim 30.0 \text{ mg}\cdot\text{cm}^{-2}$ . (b) Rate capability of LFP/CNT/TPAE, LFP/CNT/PA12, and LFP/CNT/PVDF electrodes with a mass loading of  $\sim 2.0 \text{ mg}\cdot\text{cm}^{-2}$  ( $\sim 20 \mu\text{m}$ ).

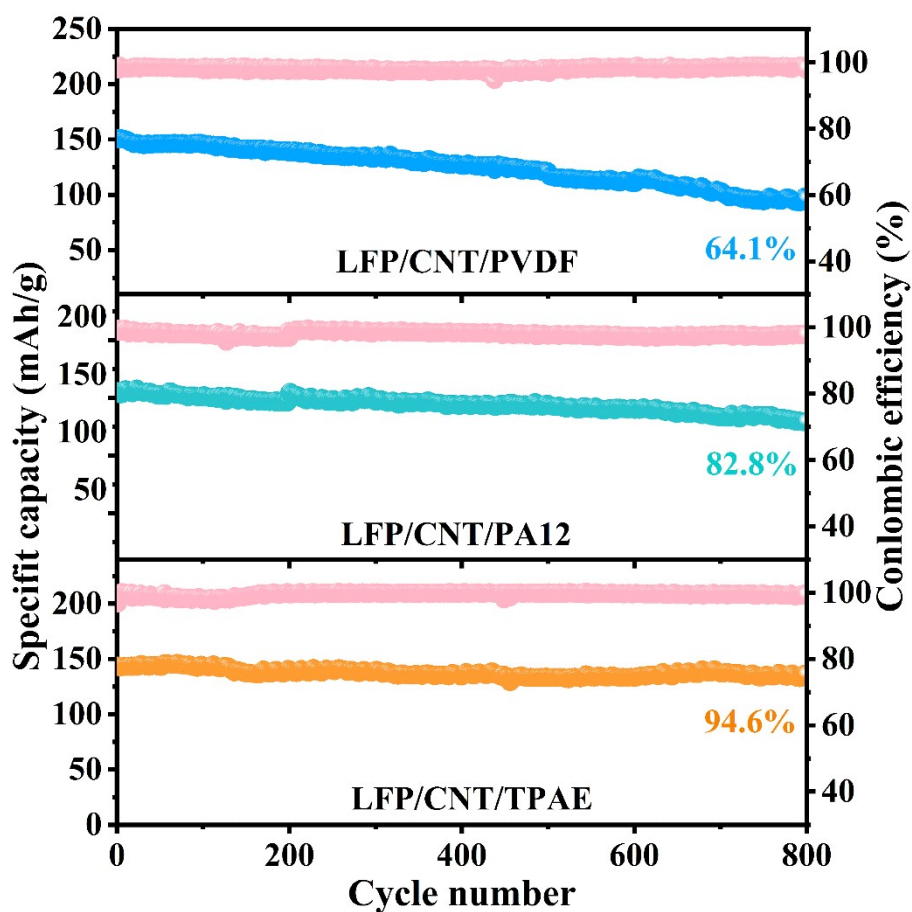

Fig S7. Cycling performance of LFP/CNT/TPAE, LFP/CNT/PA12, and LFP/CNT/PVDF cells with a mass loading of  $2.0 \text{ mg}\cdot\text{cm}^{-2}$  ( $\sim 20 \mu\text{m}$ ) at 1.0 C.

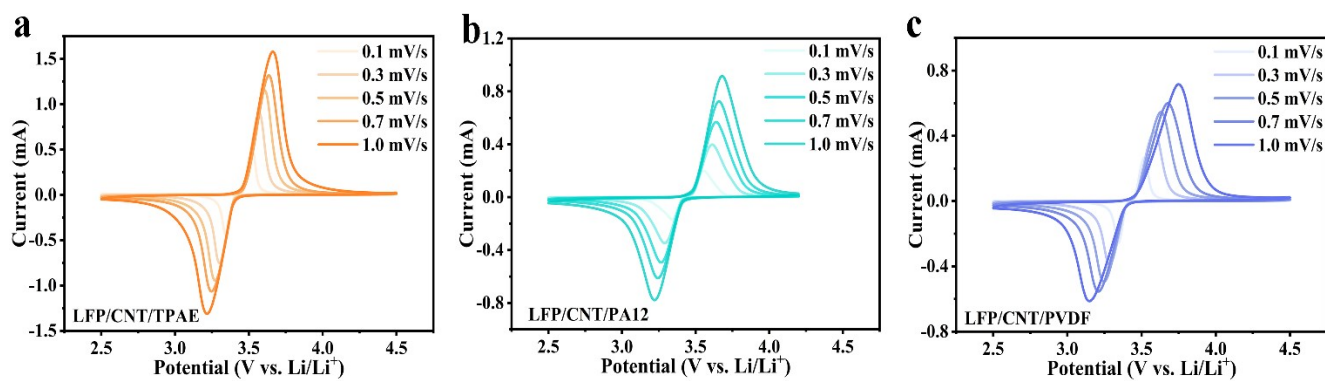

**Fig S8.** CV curves of (a) LFP/CNT/TPAE, (b) LFP/CNT/PA12, and (c) LFP/CNT/PVDF electrode.

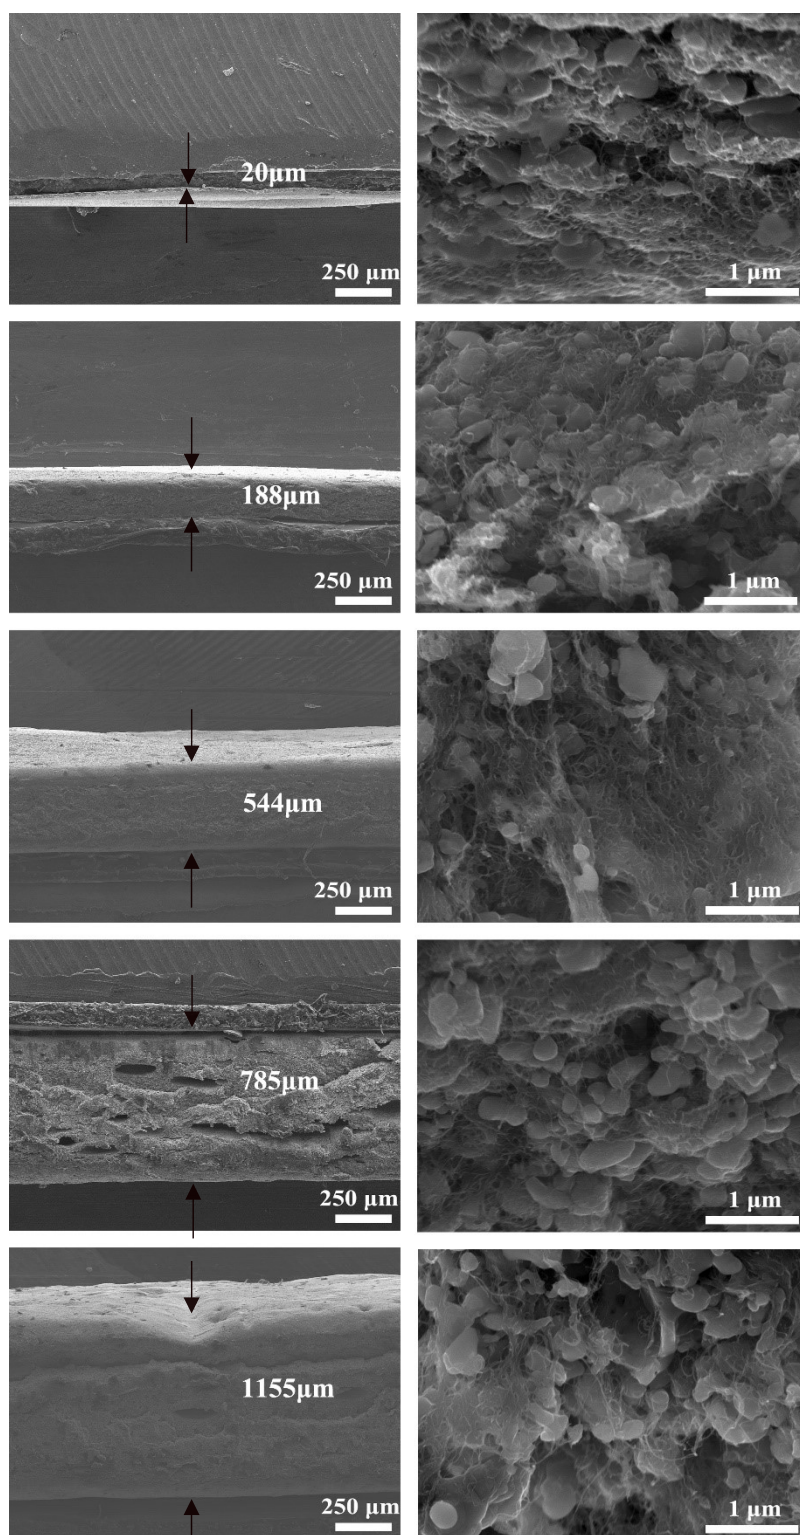

**Fig S9.** The cross-section images of LFP/CNT/TPAE electrodes with different thicknesses in the range of 20-1155  $\mu\text{m}$  (left) and the corresponding microstructure of the cross-section (right).



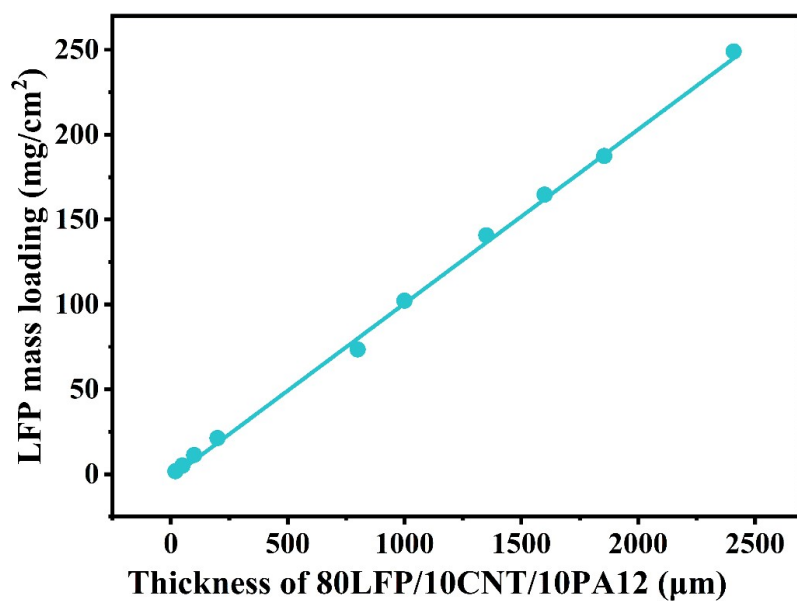

Fig S10. LFP mass loading in LFP/CNT/PA12 as a function of thickness.

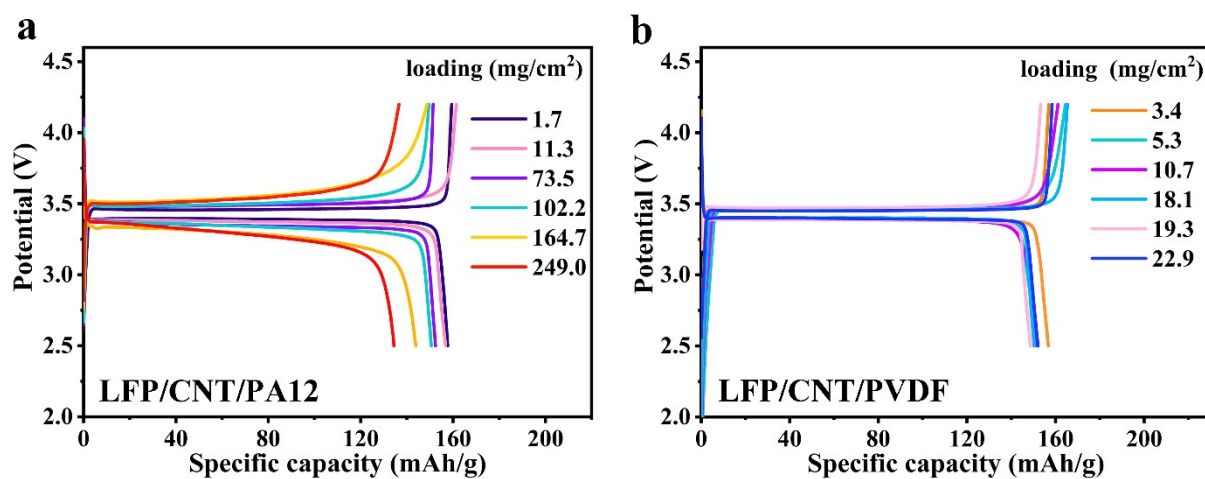

Fig S11. Charge/discharge profiles of (a) LFP/CNT/PA12 and (b) LFP/CNT/PVDF were collected at 0.1 C with different LFP mass loadings.

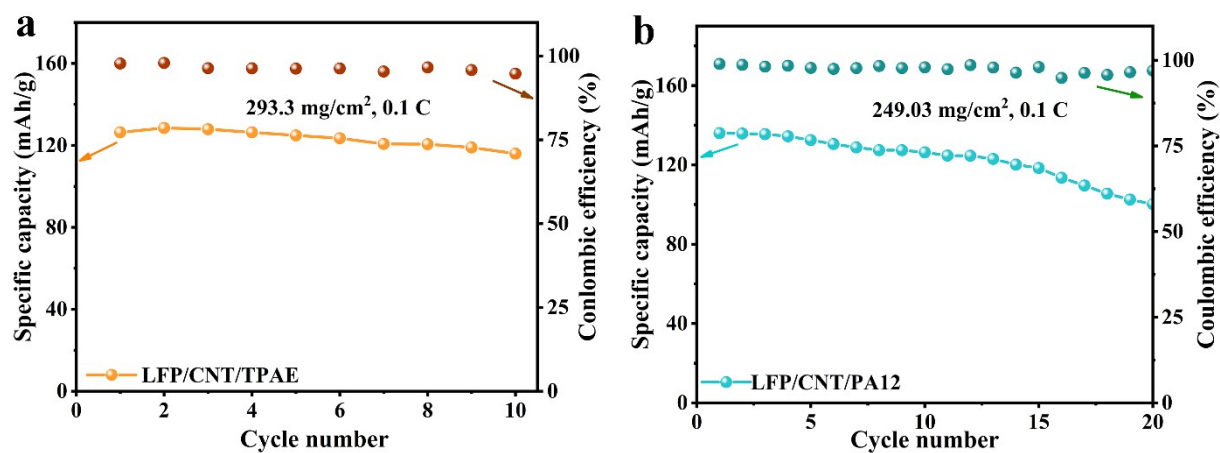

Fig S12. Cycling performance of (a) LFP/CNT/TPAE with the mass loading of 293.3 mg·cm<sup>-2</sup> and (b) LFP/CNT/PA12 with the mass loading of 249.0 mg·cm<sup>-2</sup> at 0.1 C.



**Table S2.** Areal capacity comparison of the water-based thick electrodes for LFP electrodes from literature and this work.

| Electrode composition            | Mass loadings<br>( $\text{mg}\cdot\text{cm}^{-2}$ ) | Specific capacity<br>( $\text{mAh}\cdot\text{g}^{-1}$ ) | Max. areal capacity<br>( $\text{mAh}\cdot\text{cm}^{-2}$ ) | Ref       |
|----------------------------------|-----------------------------------------------------|---------------------------------------------------------|------------------------------------------------------------|-----------|
| LMO/SuperC65/PL-CMC              | 20.3                                                | 113.0                                                   | 2.3                                                        | 38        |
| NCM811/CNT/XG-KG                 | 217.7                                               | 145.6                                                   | 31.7                                                       | 39        |
| $\text{LiCoO}_2$ /3C-binder      | 86.0                                                | 141.0                                                   | 12.1                                                       | 40        |
| $\text{LiMn}_2\text{O}_4$ /SWCNT | 190.0                                               | 105.3                                                   | 20.0                                                       | 41        |
| LMO/super-P/CMC-Li               | 70.0                                                | 100.0                                                   | 7.0                                                        | 42        |
| LFP/CNT/TPAE                     | 293.3                                               | 123.5                                                   | 36.2                                                       | This work |
| LFP/CNT/PA12                     | 249.0                                               | 136.0                                                   | 33.9                                                       | This work |

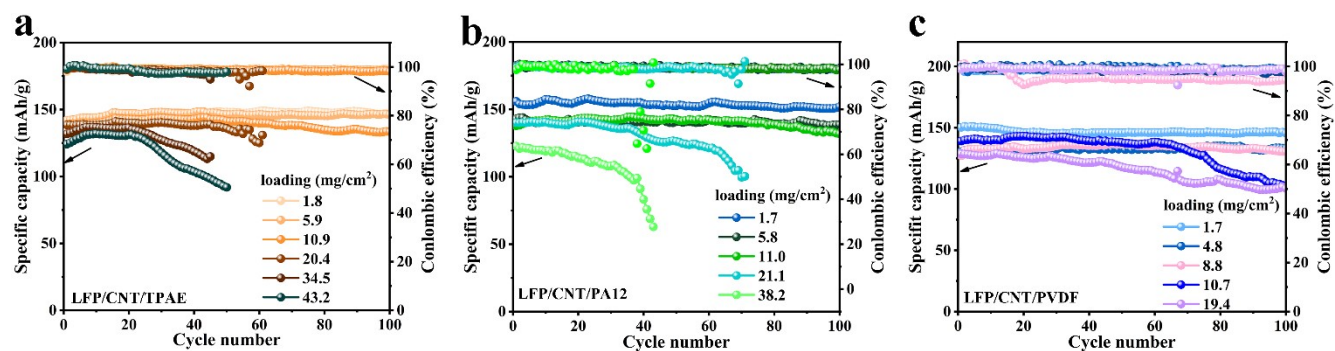

**Fig S13.** Cycling performance of (a) LFP/CNT/TPAE, (b) LFP/CNT/PA12, and (c) LFP/CNT/PVDF with different areal loading collected at 1.0 C.

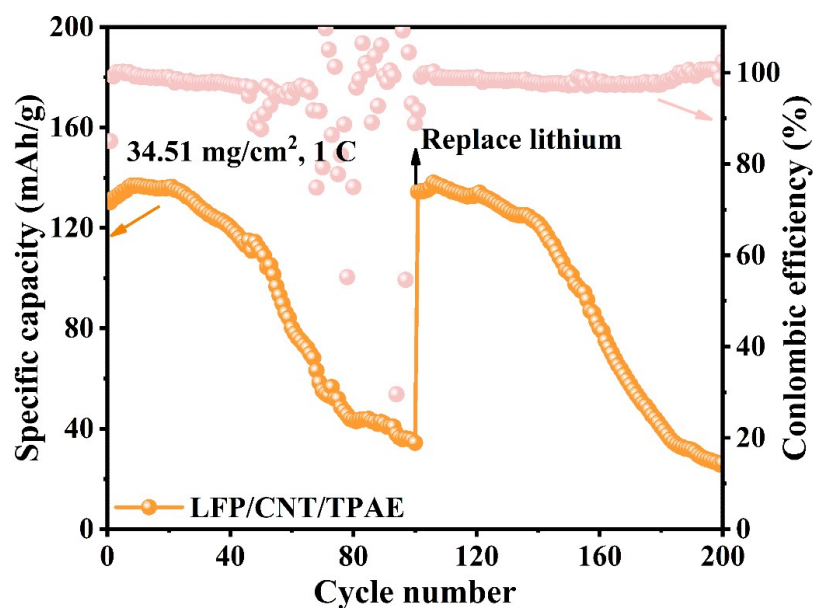

**Fig S14.** Cycle performance at 1.0 C of LFP/CNT/TPAE with a new Li metal anode at an LFP areal mass loading of 34.5  $\text{mg}\cdot\text{cm}^{-2}$ .

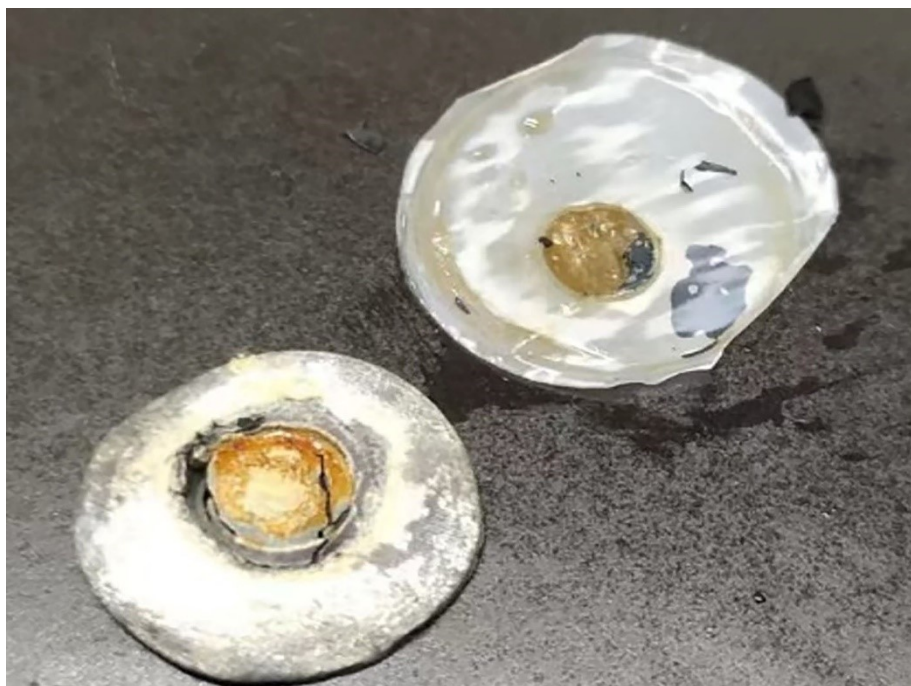

**Fig S15.** Optical photographs of Li metal anode after 100 cycles of LFP/CNT/TPAE//Li cell with LFP areal mass loading of  $34.5 \text{ mg} \cdot \text{cm}^{-2}$ .

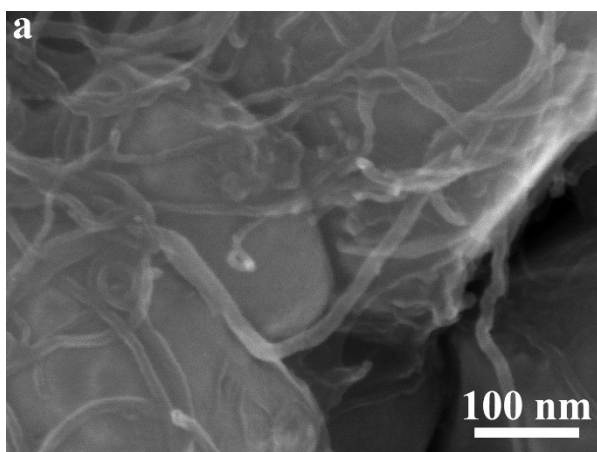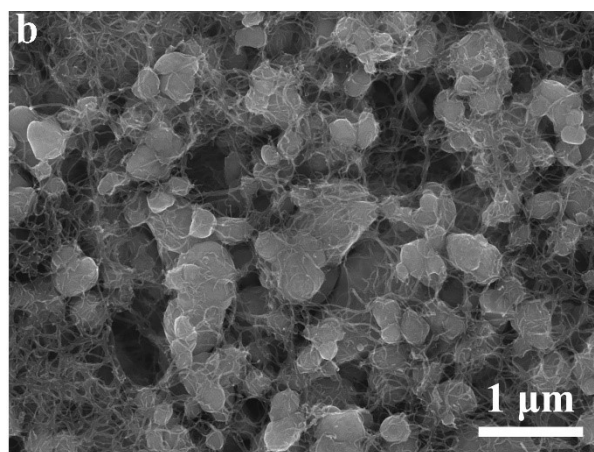

**Fig S16.** SEM images of 90LFP/5CNT/5TPAE.

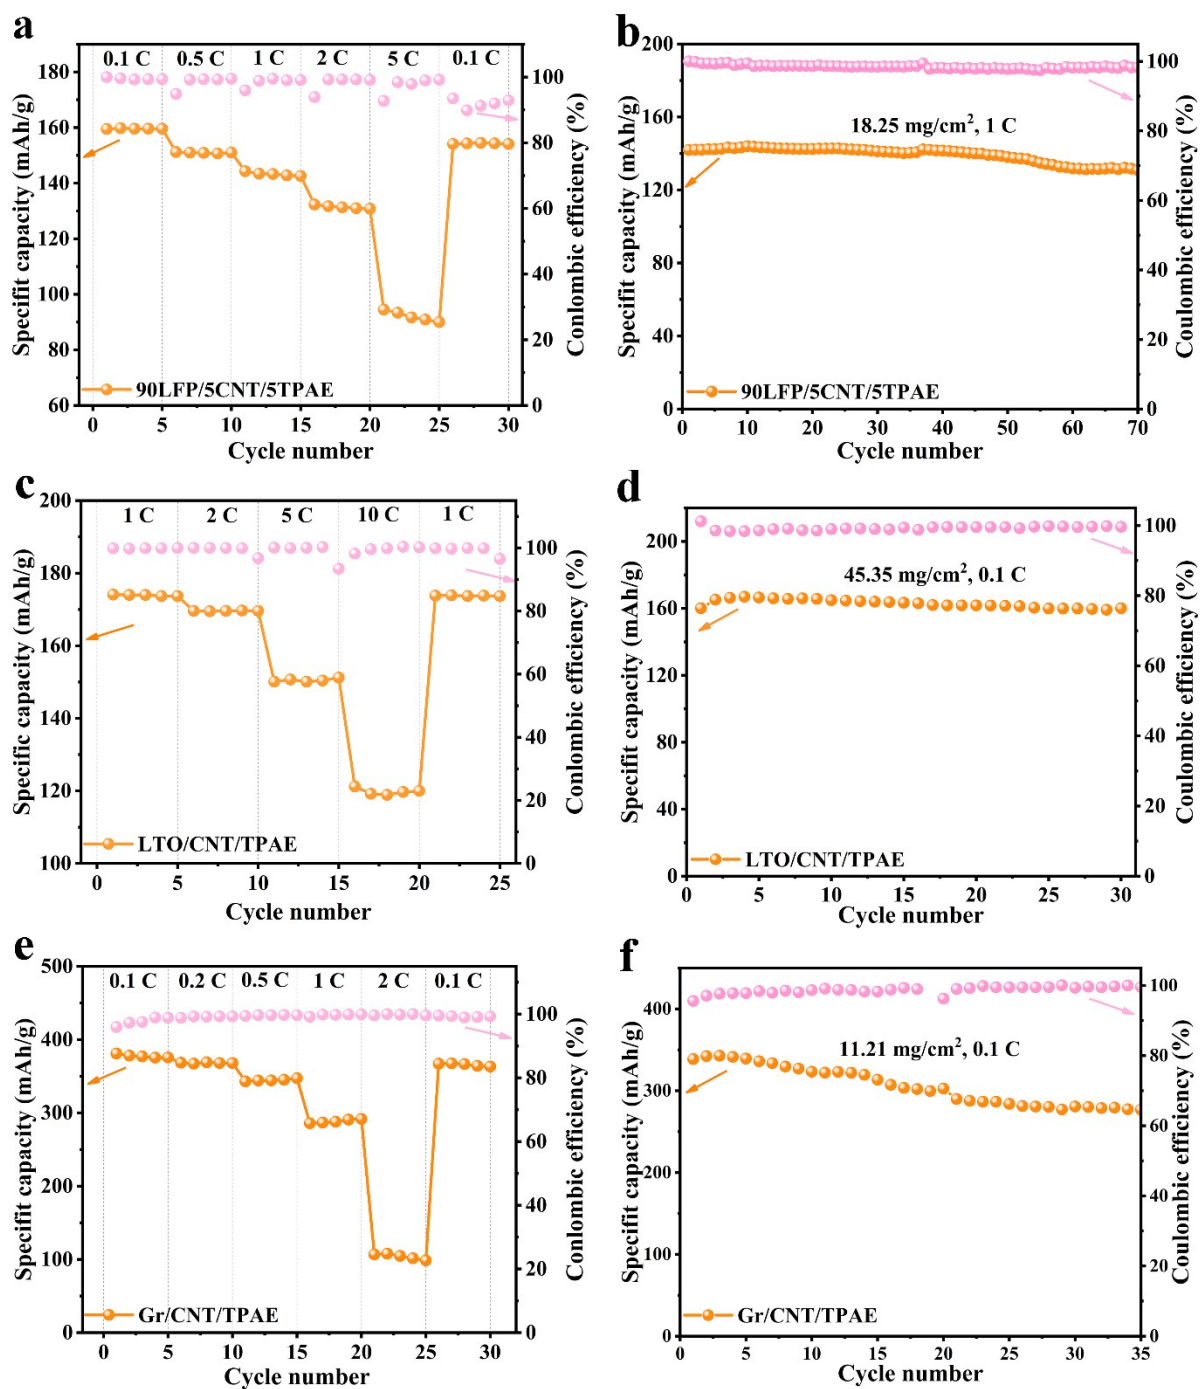

**Fig S17.** Rate capabilities of (a) 90LFP/5CNT/5TPAE with a mass loading of  $\sim 18.3 \text{ mg}\cdot\text{cm}^{-2}$ , (c) LTO/CNT/TPAE with a mass loading of  $\sim 4.15 \text{ mg}\cdot\text{cm}^{-2}$ , and (e) Gr/CNT/TPAE with a mass loading of  $\sim 2.29 \text{ mg}\cdot\text{cm}^{-2}$ . Cycle performance of (b) 90LFP/5CNT/5TPAE, (d) LTO/CNT/TPAE, and (f) Gr/CNT/TPAE.

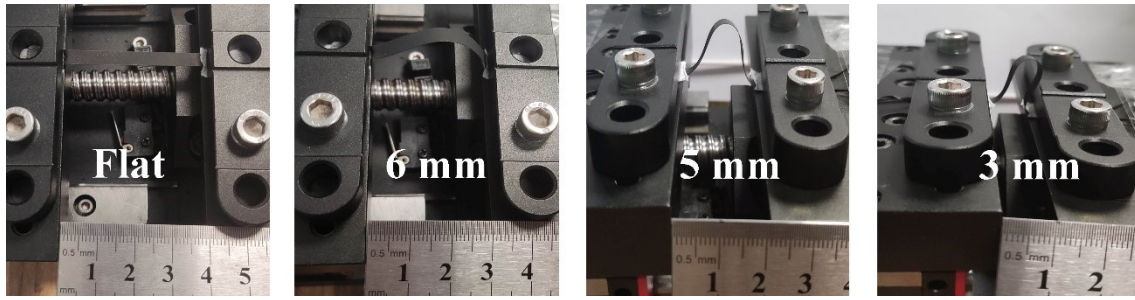

Fig S18. Corresponding digital photos of LFP/CNT/PA bending from a flat state to various bending radius of 6, 5, and 3 mm.

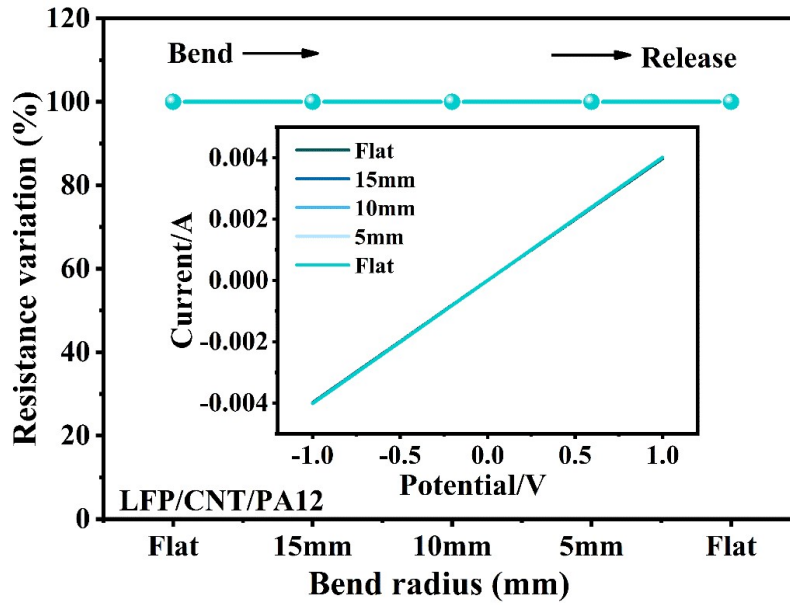

Fig S19. The LSV curves of LFP/CNT/PA12 when bent from a flat state to various bend radius and released to a flat state.

Equations:

Equation S1. The diffusion coefficients  $D$  of  $\text{Li}^+$  were calculated according to the following equation:

$$D_{\text{Li}} = R^2 T^2 / 2 A^2 n^4 F^4 C_0^2 \sigma^2$$

Where  $D_{\text{Li}}$  is the  $\text{Li}^+$  diffusion coefficient in LFP electrode ( $\text{cm}^2 \cdot \text{s}^{-1}$ ),  $R$  is the gas constant ( $8.314 \text{ J} \cdot \text{mol}^{-1} \cdot \text{K}^{-1}$ ),  $T$  is the absolute temperature (298 K),  $A$  is the surface area of the electrode ( $0.19625 \text{ cm}^2$ ),  $n$  is the number of electrons transferred per molecule during the electrochemical reaction (for LFP,  $n = 1$ ),  $F$  is the Faraday constant ( $96485 \text{ C} \cdot \text{mol}^{-1}$ ),  $C_0$  is the molar concentration of  $\text{Li}^+$  in LFP ( $2.28 \times 10^{-2} \text{ mol} \cdot \text{cm}^{-3}$ ), and  $\sigma$  is the Warburg factor associated with  $Z'$ .

Equation S2. Randles-Sevcik formule

$$I_p = 2.69 \times 10^5 n^{3/2} A D_{\text{Li}}^{1/2} C_0 \nu^{1/2}$$

where  $I_p$  is the peak current (A),  $n$  is the number of electrons transferred per molecule during the electrochemical reaction (for LFP,  $n = 1$ ),  $A$  is the active surface area of the electrode ( $\text{cm}^2$ ),  $C_0$  is the molar concentration of  $\text{Li}^+$  in LFP ( $2.28 \times 10^{-2} \text{ mol} \cdot \text{cm}^{-3}$ ),  $D_{\text{Li}}$  is the  $\text{Li}^+$  diffusion coefficient in LFP ( $\text{cm}^2 \cdot \text{s}^{-1}$ ), and  $\nu$  is the scanning rate ( $\text{V} \cdot \text{s}^{-1}$ ). According to this formula,  $D_{\text{Li}}$  is proportional to  $I_p^{-1/2}$ .
